# Supplementary material
Source: PubMed Central journal article supplement (PMC3592022)
Supplement: MCB.01044-12_zmb999109876so1.pdf [file MCB.01044-12_zmb999109876so1.pdf]

## Supplementary Figure S1

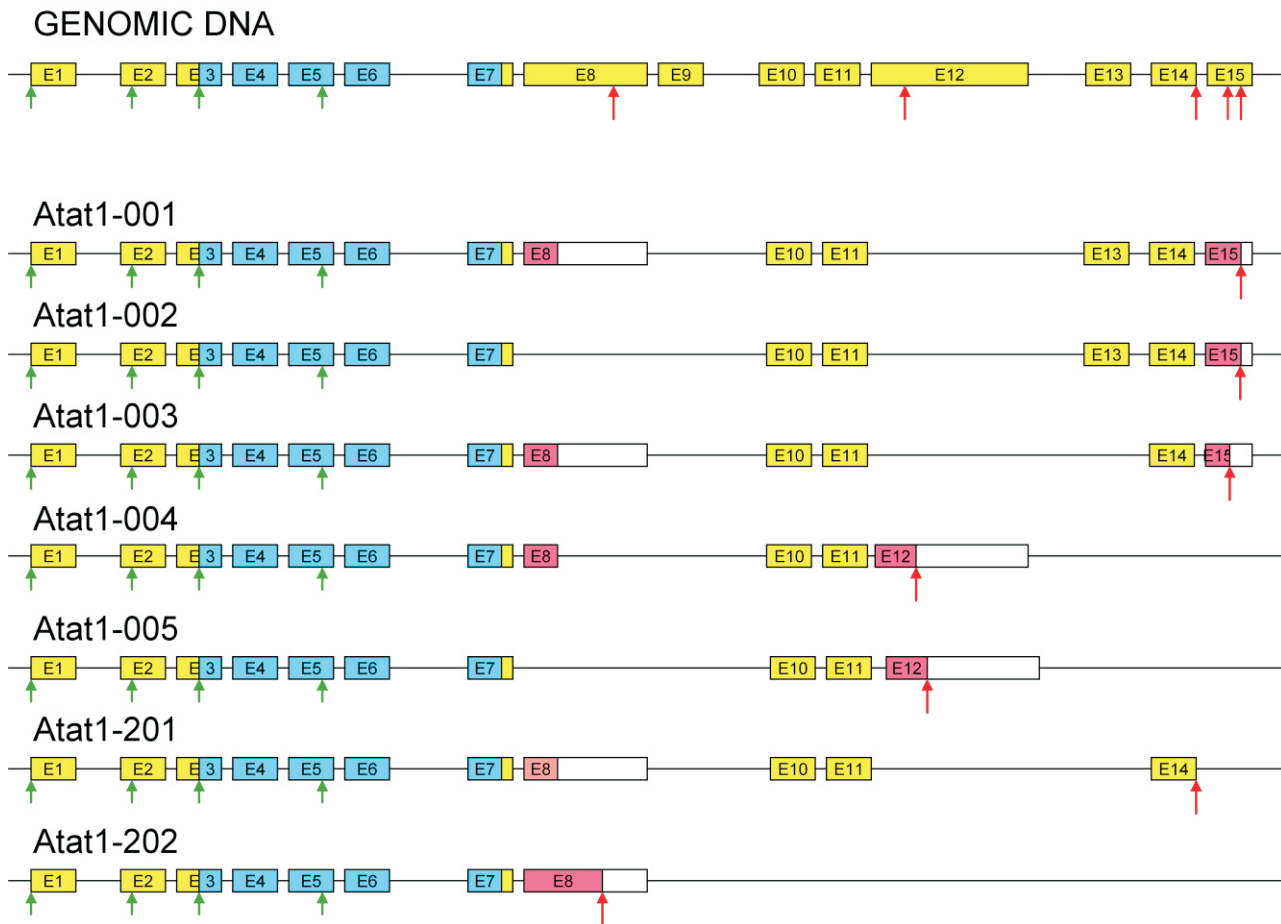

**Supplementary figure S1.  $\alpha$ TAT1 splice variants.** The mouse *Atat1* gene (ENSMUSG00000024426) is located on chromosome 17 and it consists of 15 exons. 18 transcripts have been predicted (source: ENSEMBL database). Most do not result in a recognizable protein product or they are targeted by nonsense mediated decay (source: ENSEMBL database). For five of the protein-coding transcripts we generated specific primers to test them by qRT-PCR. All of the tested transcripts contain the N-terminus (exons 1-2) and acetyl-transferase domain (exons 3-7). However, their C-termini differ. Transcripts *atat1-001* and *atat1-002* contain exons 10, 11, 13, 14 and 15 with transcript *atat1-001* containing also a part of exon 8. The same part of exon 8 is present also in the transcript *atat1-201* that also contains exons 10, 11 and 14. Transcript *atat1-005* is identical to *atat1-201* except it does not contain exon 14, but 12. Finally, transcript *atat1-202* is unique since it contains a longer version of exon 8 that harbors a stop codon.

The image is a schematic representation of *Atat1* transcripts. Exons are marked in yellow with a letter “E” and a number. Blue color indicates the acetyltransferase domain. Pink color indicates truncated exons. Start and stop codons are marked with green and red arrows, respectively.

## Supplementary Figure S2

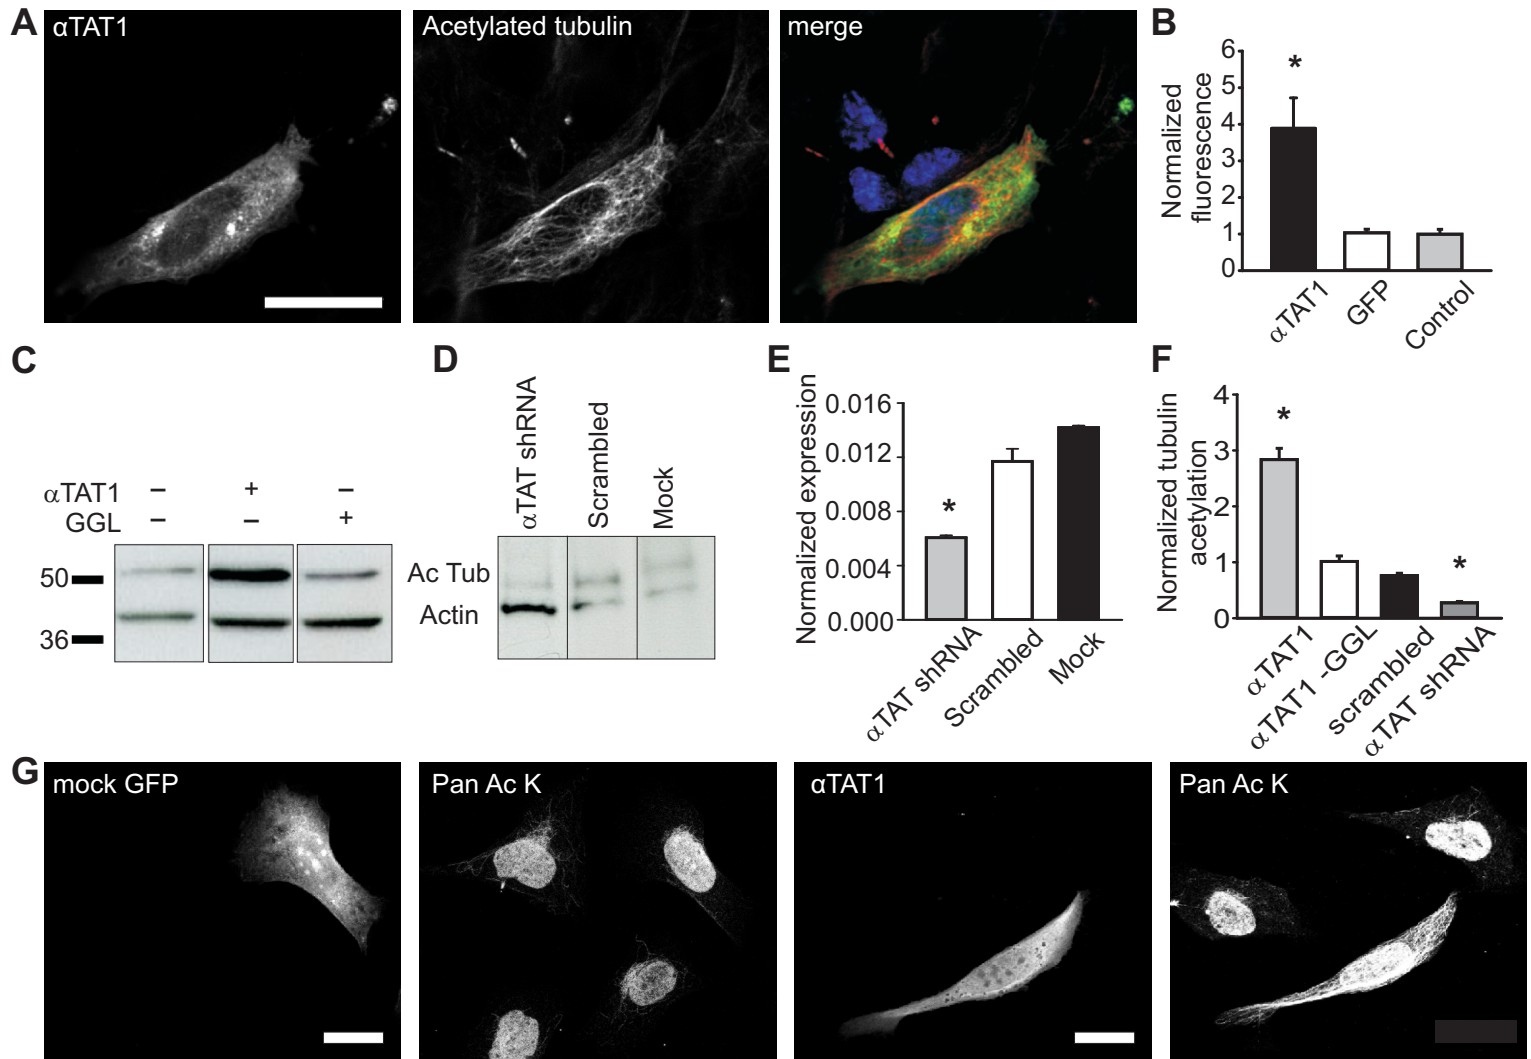

**Supplementary figure S2.  $\alpha$ TAT1 acetylates microtubules.** (A and B) CHO cells were transiently transfected with YFP- $\alpha$ TAT1 or mock GFP and stained with 6-11b-1 acetylated tubulin antibody (A). Quantification (B) shows average fluorescent intensity ( $p < 0.015$ ,  $n = 20$ ). (C to E) Immunoblots of whole cell extracts with 6-11b-1. The  $\alpha$ TAT1-GGL mutant is catalytically inactive whereas overexpression of  $\alpha$ TAT1 increases tubulin acetylation (C). shRNA targeted against  $\alpha$ TAT1 reduced endogenous tubulin acetylation (D) and expression levels of  $\alpha$ TAT1 in NIH3T3 cells (E) measured by qRT-PCR ( $p < 0.01$ ,  $n = 3$ ). Quantification of acetylated tubulin levels (F) shows higher acetylation with  $\alpha$ TAT1 overexpression and 70% reduction with shRNA ( $p < 0.01$  in both cases,  $n > 3$ ). (G). CHO cells transfected with YFP- $\alpha$ TAT1 (left 2 panels) or mock GFP (right 2 panels) and stained with pan specific anti-acetyl lysine antibody. Scale bars, 20 $\mu$ m.

## Supplementary Figure S3

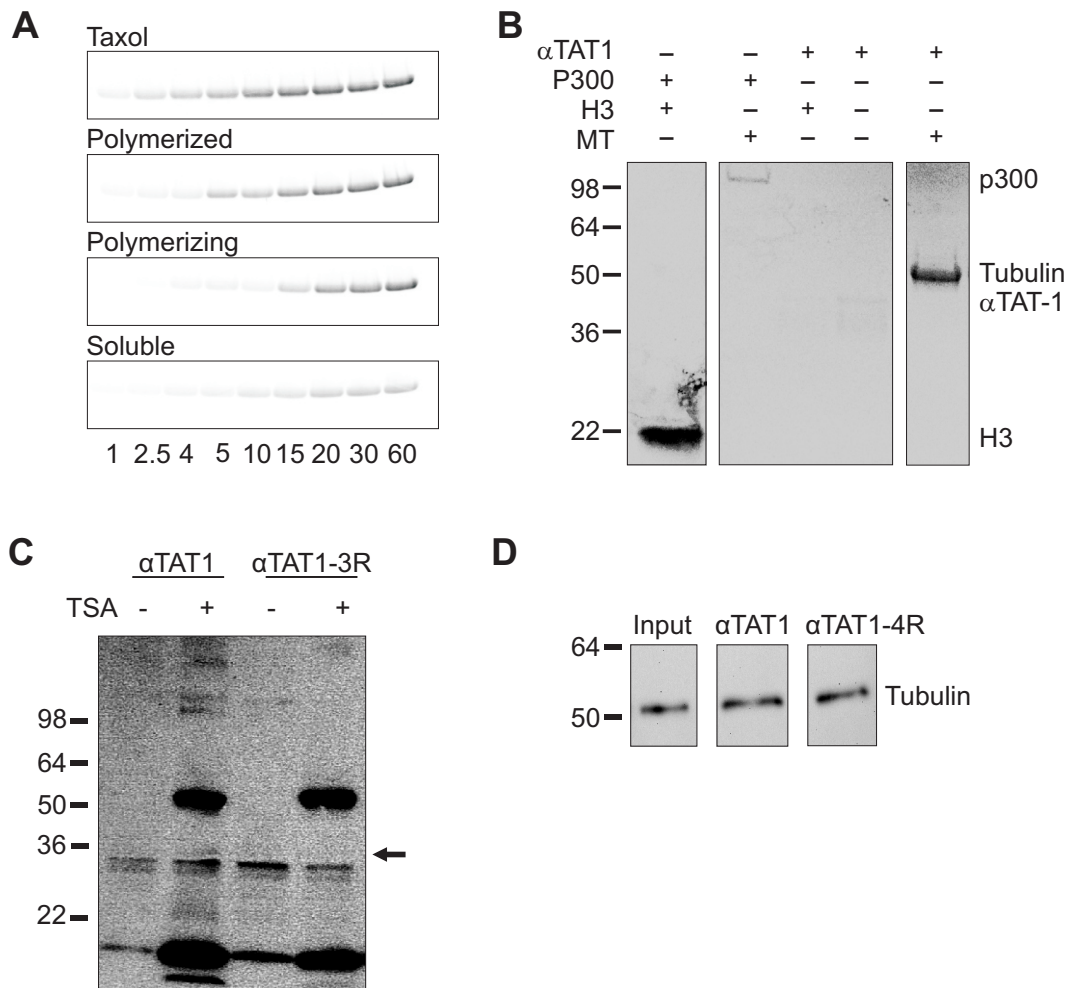

**Supplementary figure S3.  $\alpha$ TAT1 mediated acetylation in vitro.** (A) Stable and polymerized microtubules are the preferred substrate for  $\alpha$ TAT1. Example of autoradiography for analysis displayed in Figure 2C. Reactions were stopped by adding SDS loading buffer at times indicated below (in minutes). (B)  $\alpha$ TAT1 specifically acetylates microtubules in vitro. Autoradiography of [ $^{14}$ C]acetyl incorporation.  $\alpha$ TAT1 readily acetylates microtubules (MT), but does not acetylate histones (H3). In the reaction with histones and without tubulin a band at 37kDa is visible that corresponds to  $\alpha$ TAT1 itself. The histone acetyl-transferase P300/CBP strongly acetylates histones, but does not influence microtubule acetylation. (C)  $\alpha$ TAT1-3R (we originally discovered 3 lysine residues to be acetylated; K56R, K210R, K221R, see also Supplementary table S1) acetylation is undetectable. Acetyl-lysine immunoblot of 3T3 cells treated or not treated with trichostatin A (TSA, 5 $\mu$ M) for 4 hours. Additional band (arrow) that corresponds to  $\alpha$ TAT1 itself is absent in  $\alpha$ TAT1-3R over expression. (D)  $\alpha$ TAT1-4R interacts with purified microtubules. Experiment was performed as in Figure 2D.

## Supplementary Figure 4

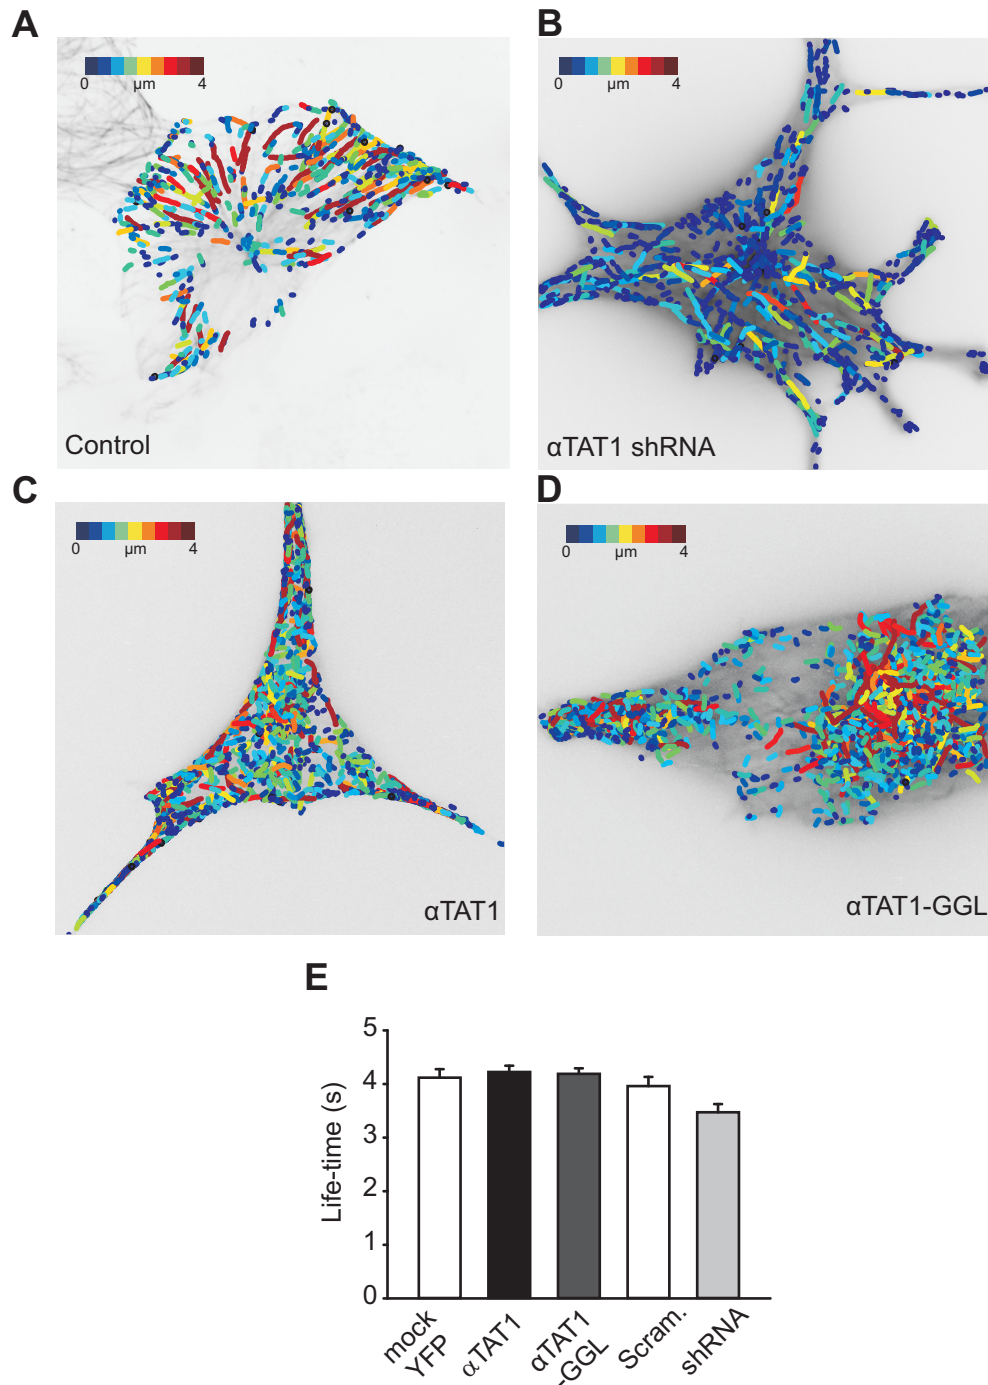

**Supplementary figure S4.  $\alpha$ TAT1 affects displacement but not lifetime of EB3 particles.** (A - E)  $\alpha$ TAT1 knock-down decreases and over expression increases the displacement of EB3 particles. Live cell images with a color-coded overlay representing EB3 particle displacement. NIH3T3 cells were transfected with RFP-EB3 and mock YFP (A),  $\alpha$ TAT1 shRNA (B), YFP- $\alpha$ TAT1 (C), or YFP- $\alpha$ TAT1-GGL (D) respectively. (E) Quantification of EB3 particle life-time reveals no significant difference between groups (n=20).

## **Supplementary videos:**

**video1.avi** EB3 particle growth. NIH3T3 cells were transfected with RFP-EB3 and mock YFP and imaged 24 hours later using an Ultraview Vox Spinning disk microscope (PerkinElmer) with a 100x objective.

**Supplementary table S1. Identification of acetylated lysine residues on  $\alpha$ -tubulin and  $\alpha$ TAT1<sup>1</sup>.**

| <b>Protein</b>    | <b>Acetylation sites</b> | <b>Region</b>       |
|-------------------|--------------------------|---------------------|
| $\alpha$ -tubulin | K40                      | Lumen               |
| $\alpha$ TAT1     | K56                      | Ac domain – motif C |
| $\alpha$ TAT1     | K146                     | Ac domain – motif A |
| $\alpha$ TAT1     | K210                     | C-terminus          |
| $\alpha$ TAT1     | K221                     | C-terminus          |

<sup>1</sup> Initially we found 3 lysine sites on  $\alpha$ TAT1 that can be acetylated (K56, K210, K221). Subsequently, we also identified the 4th site (K146). We were not able to find any further sites, although we leave the possibility that other sites might be present open. When we had identified only three sites we performed all experiments on cells and observed an effect (the 3R mutant showed roughly 50% less acetylation of microtubules). We also found that the 3R mutant cannot be detected on a western blot against pan acetylated lysine antibody after the cells have been treated with TSA (Supplementary figure S3C). Upon identification of the 4th site we repeated the experiments in cells and found a stronger effect, as presented in the Fig. 4E-F.
